# Supplementary material
Source: Springer Nature journal article supplement (https://www.springermedizin.de/resource/supplementary/12875_2006_255_MOESM3_ESM.pdf/9436608)

# Sensitivity

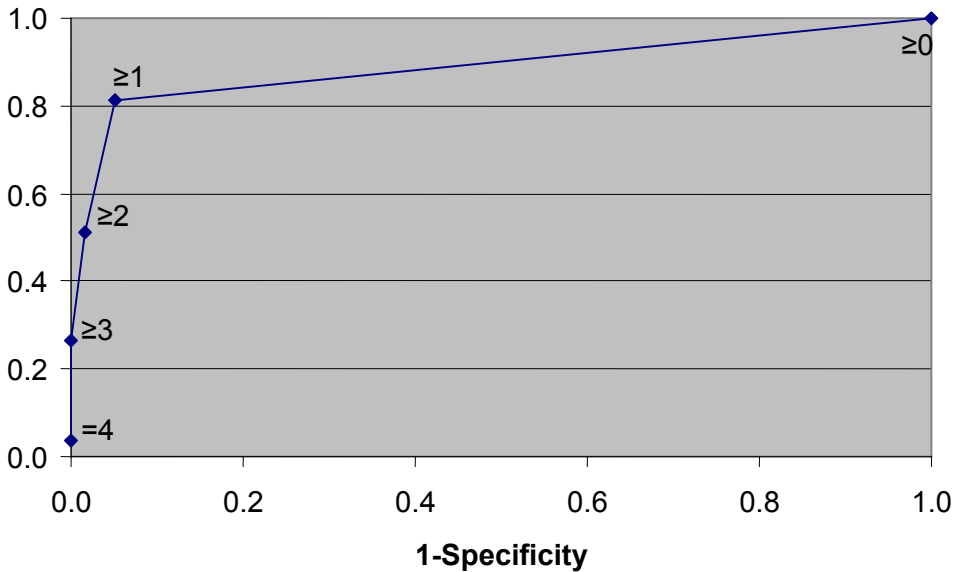

Supplement: MOESM3 [file 9436608]
